# Supplementary material for: Nitrogen and sulfur co-doped ordered mesoporous carbon with enhanced electrochemical capacitance performance
Source: Royal Society of Chemistry journal article supplement (doi:10.1039/c3ta11208j), 2013-01-01
Supplement: c3ta11208j.pdf [file c3ta11208j.pdf]

### Supporting Information

Table S1. Summary of XPS Peak Analysis on NSOMC materials.

| Samples | Species | NSOMC-650 |                            |               | NSOMC-800 |                            |               | NSOMC-950 |                            |               |
|---------|---------|-----------|----------------------------|---------------|-----------|----------------------------|---------------|-----------|----------------------------|---------------|
|         |         | B.E. (eV) | Rel. int. <sup>a</sup> (%) | Conc. (at. %) | B.E. (eV) | Rel. int. <sup>a</sup> (%) | Conc. (at. %) | B.E. (eV) | Rel. int. <sup>a</sup> (%) | Conc. (at. %) |
| C1s     | C1      | 284.6     | 52.4                       |               | 284.6     | 39.7                       |               | 284.6     | 34.3                       |               |
|         | C2      | 285.3     | 21.7                       | 85.0          | 285.4     | 45.0                       | 86.3          | 285.4     | 52.7                       | 87.9          |
|         | C3      | 286.2     | 18.8                       |               | 286.5     | 10.3                       |               | 286.9     | 4.3                        |               |
|         | C4      | 288.8     | 7.1                        |               | 289.7     | 5.1                        |               | 289.2     | 8.7                        |               |
| N1s     | N1      | 400.6     | 75.8                       | 10.0          | 400.8     | 88.9                       | 7.4           | 400.9     | 95.2                       | 4.8           |
|         | N2      | 398.4     | 24.1                       |               | 398.3     | 11.1                       |               | 398.4     | 4.8                        |               |
| S2p     | S1      | 163.9     | 21.4                       |               | 163.6     | 23.9                       |               | 163.8     | 30.6                       |               |
|         | S2      | 164.7     | 22.2                       | 0.69          | 164.7     | 25.3                       | 0.81          | 164.7     | 8.1                        | 0.92          |
|         | S3      | 165.6     | 4.6                        |               | 165.4     | 35.4                       |               | 165.3     | 7.7                        |               |
|         | S4      | 167.7     | 51.8                       |               | 167.8     | 15.3                       |               | 167.9     | 53.6                       |               |

<sup>a</sup> Rel. int. denotes the relative intensity of the dopant species.

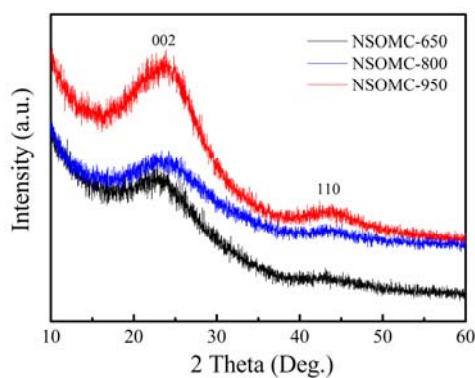

Figure S1. Wide-angle XRD patterns of NSOMC materials.

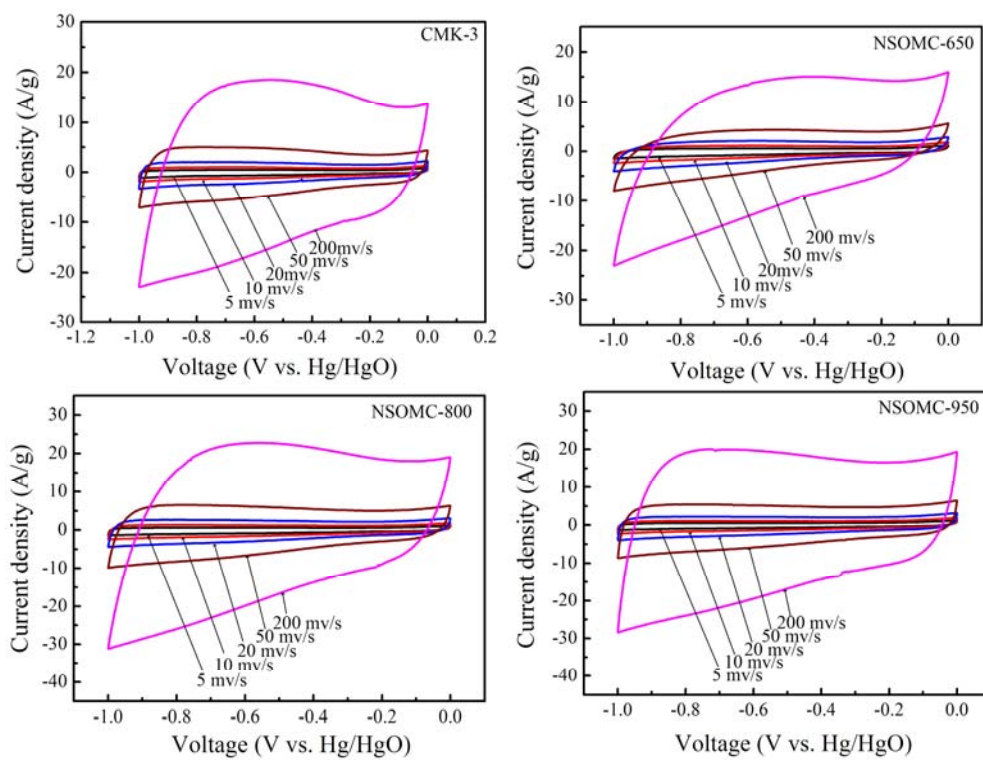

Figure S2. The CV curves of CMK-3 and NSOMC materials at different scan rates.
